# Supplementary material for: Three-Dimensional Microtumor Formation of Infantile Hemangioma-Derived Endothelial Cells for Mechanistic Exploration and Drug Screening
Source: MDPI journal article supplement (doi:10.3390/ph15111393), 2022-11-12
Supplement: s1 [file s1]

**Figure S1 The cell density of different plate**

\* $P < 0.05$ , compared to the untreated plate, # $P < 0.05$ , compared to the dECM-coated plate

**Figure S2 The results of the cell viability after 24 hours of pharmacological intervention**

(A) Propranolol, (B) metformin \* $P < 0.05$ , compared to the control group
